# Supplementary material for: Internet survey on the actual situation of constipation in the Japanese population under 70 years old: focus on functional constipation and constipation-predominant irritable bowel syndrome
Source: PubMed Central journal article supplement (PMC6942565; doi:10.1007/s00535-019-01611-8), 2019-08-19

# Supplementary figure 1

## Comparison of stool frequency and shape between IBS-C group and FC Group

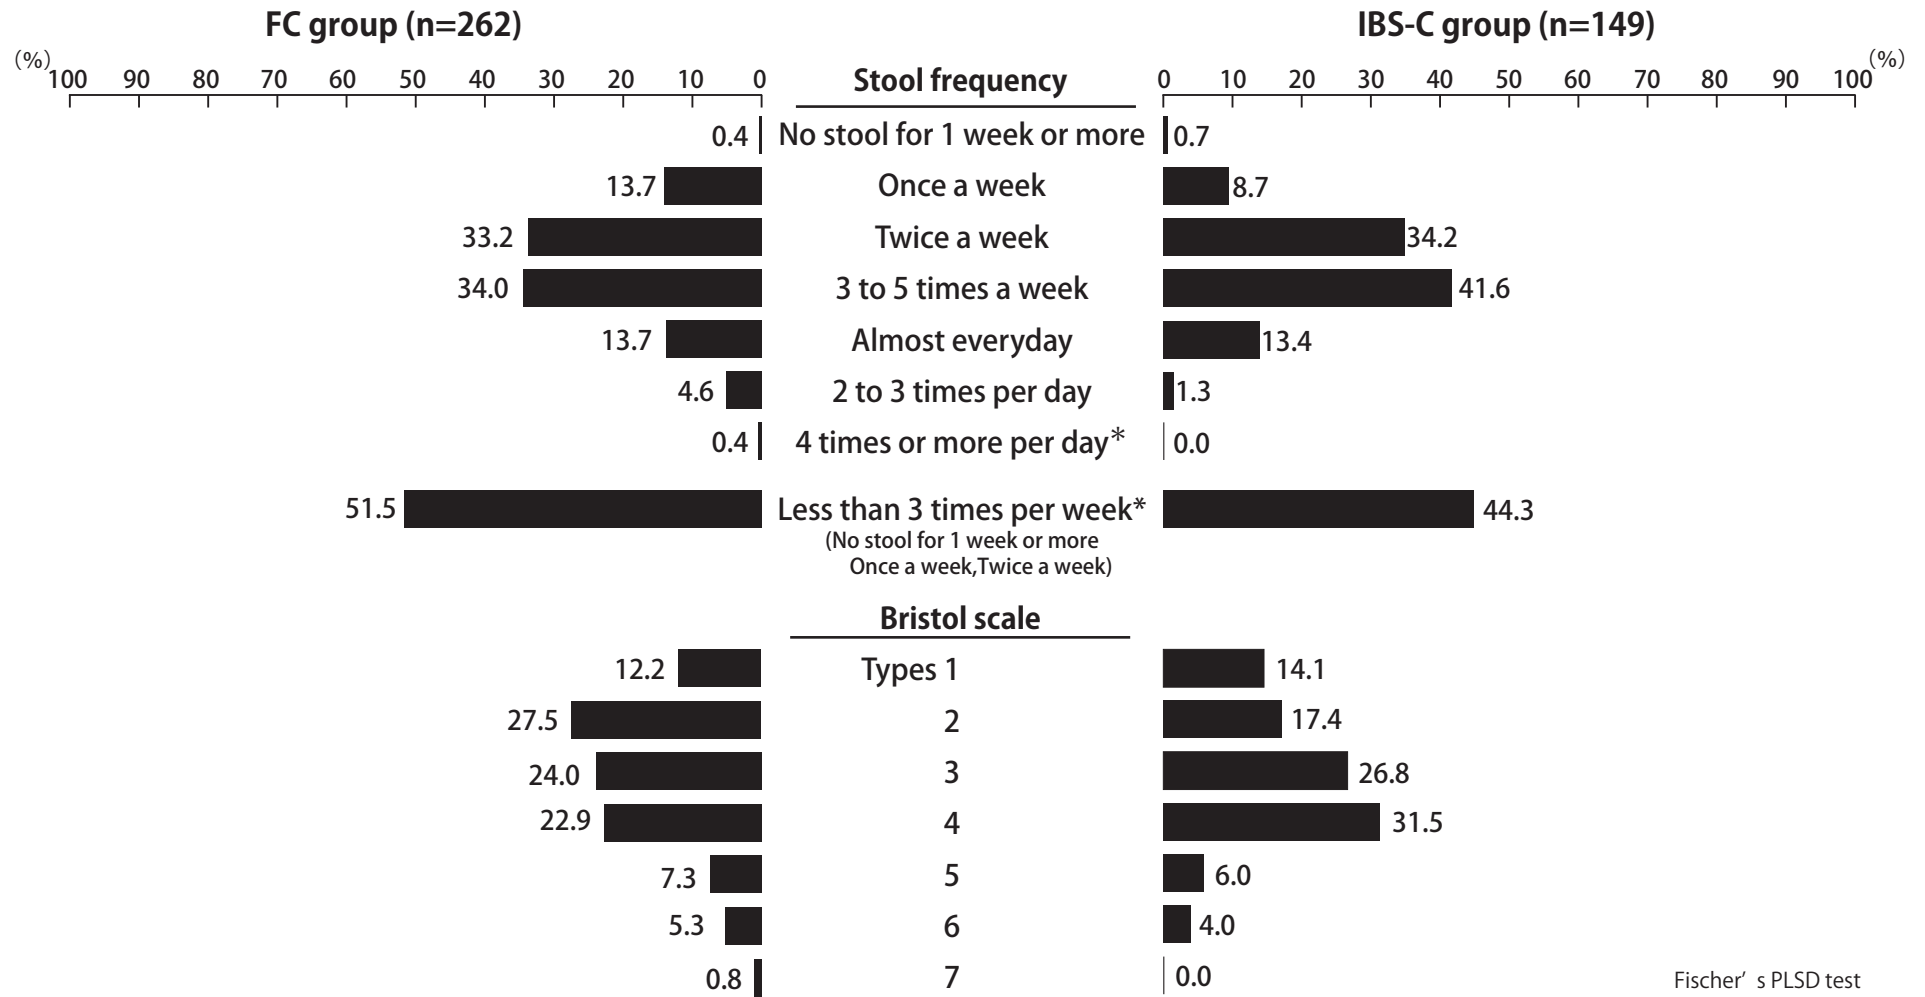

Fischer's PLSD test  
\*p<0.05

## Supplementary figure 2 Assessment by HADS

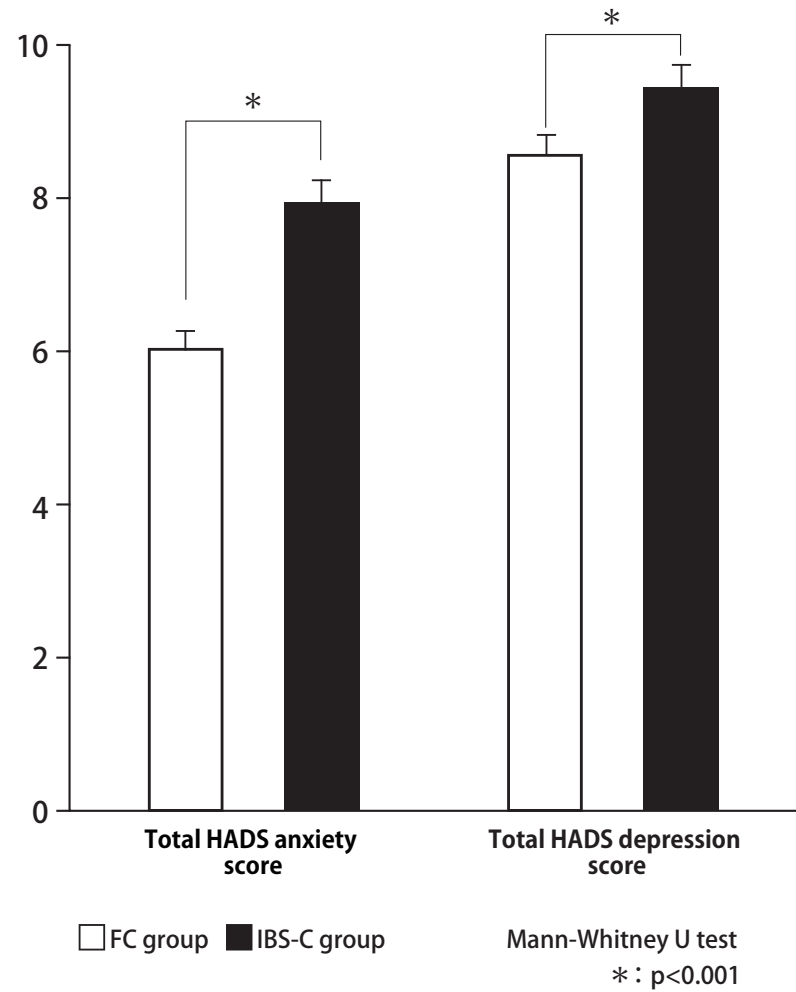

Supplement: 535_2019_1611_MOESM1_ESM.pdf [file 535_2019_1611_MOESM1_ESM.pdf]
